# Supplementary material for: WTD Attenuating Rheumatoid Arthritis via Suppressing Angiogenesis and Modulating the PI3K/AKT/mTOR/HIF-1α Pathway
Source: Front Pharmacol. 2021 Sep 27;12:696802. doi: 10.3389/fphar.2021.696802 (PMC8502817; doi:10.3389/fphar.2021.696802)
Supplement: Supplementary file 1 [file Table2.XLSX]

## Sheet: Sheet1
Database	Gene
Genecards	1092
Drugbank	171
DisGeNET	1025
OMIM	258
pharmGK	55
TTD	130
Gene of RA 2147	Drug targets of WTD 863	overlap gene
ACAN	NOX4	ABCB1
ACP5	AKR1B1	ABCC1
ADAMTS5	CDK5	ABCG2
ADAMTS7	CDK5R1	ABCG2
ADGRB1	XDH	ACACA
ADMIO1	MAOA	ACHE
AFF3	FLT3	ACP1
AGM2	CA2	ADA
AGM7	CDK1	ADAM10
AGM8	CCNB1	ADAM17
AIADK	CCNB2	ADAMTS4
AIEFL	CCNB3	ADAMTS5
AIFEC	ALOX5	ADIPOQ
AILJK	ADORA1	ADORA2A
AIRE	CA7	ADORA3
AKU	GLO1	ADRB2
ALPS	APP	AGTR1
ALPS2A	SYK	AHR
ALPS3	GSK3B	AHSA1
ALPS5	PARP1	AKR1B1
ANFH1	TTR	AKR1B10
ANKH	MMP9	AKR1C1
ANXA1	CA12	AKR1C2
APCS	MMP2	AKR1C4
APLAID	CA4	AKT1
APOH	MMP12	AKT2
APRTD	CD38	ALOX15
ARF6	CYP1B1	ALOX5
AXL	ABCG2	ALOX5
BARTS3	AKR1B10	ALPL
BLK	TNKS2	ANPEP
BST2	TNKS	APOB
C1QC	TOP1	APP
C1QD	ARG1	AR
C3	PTPRS	ATIC
C3D	ABCC1	BAX
C4B	HSD17B1	BCHE
C6	ACHE	BCL2
C6D	CDK6	BCL2A1
C8D2	ABCB1	BCL2L1
CARD14	HSD17B2	BDKRB2
CAST	ALOX15	BIRC5
CCA	ALOX12	BLK
CCDC134	ESR2	BMP4
CCL7	CYP19A1	BRAF
CCR6	ADORA2A	BTK
CD40	CSNK2A1	C5AR1
CD69	ESR1	CA2
CES1	PTGS2	CA3
CFID	CFTR	CALCA
CGD5	AMY1A	CASP1
CHD3	GRK6	CASP3
CHI3L1	CDK2	CASP8
CHRNA7	TERT	CAT
CILD1	CA1	CAV1
CIMAH	CA9	CCL2
CINCA	TYR	CCND1
CLEC4D	AHR	CCR1
COL2A1	ESRRA	CCR4
COPA	GPR35	CCR5
CR1	DAPK1	CD14
CTSK	AVPR2	CD38
CVID8	IGF1R	CD40LG
CVT	EGFR	CD81
CYBB	F2	CDK4
CYP2C9	PIM1	CDK6
DBQD1	AURKB	CDKN1A
DDH2	DRD4	CDKN2A
DEF6	MPO	CFTR
DFNA34	PIK3R1	CHRM3
DIAR5	PYGL	CHUK
DNASE1	SRC	CMA1
EDAID1	PTK2	CNR1
EDAID2	KDR	CNR2
EDN1	MMP13	COL1A1
EDSPD1	MMP3	COMT
EEF1A1	CA3	CRP
EPCAM	PLK1	CSF1R
F2RL1	CA6	CSK
FAS	PKN1	CTSB
FASLG	CA14	CTSD
FBL	MET	CTSK
FCAS2	NEK2	CTSL
FCGR1A	CXCR1	CTSS
FCGR2B	CAMK2B	CXCL10
FCGRT	ALK	CXCL11
FERLK	AKT1	CXCL2
FFAR2	NEK6	CXCL8
FGF21	PLA2G1B	CXCR1
FL1	CA5A	CXCR2
FLHS	BACE1	CXCR4
FMF	AXL	CYP11B1
FN1	NUAK1	CYP11B2
FOXO3A	AKR1C2	CYP17A1
GDF5	AKR1C1	CYP19A1
GFI1	AKR1C3	CYP1A1
GOLGA8B	AKR1C4	CYP1A2
GOLGB1	CA13	CYP1B1
GP5	AKR1A1	CYP2C19
GPA	PFKFB3	CYP2C9
GPHYSD1	KDM4E	CYP2D6
GPSM3	PLG	CYP3A4
GRN	AR	DHFR
GSD1A	PTGS1	DHODH
GSD1B	HSP90	DPEP1
GSD1C	PRSS1	DPP4
GSD7	NCOA2	DRD2
HCP5	PRKACA	E2F2
HFE1	DPP4	EDNRA
HFE2A	PIK3CG	EGF
HFE3	RELA	EGFR
HFTC1	VEGFA	ELANE
HIDS	CCND1	EPHB2
HJCYS	BCL2L1	ERBB2
HLA-B	CDKN1A	ESR1
HNFJ1	CASP9	ESR2
HOMG3	MAPK1	ESRRA
HP1	IL10	F2
HPRT1	RB1	F3
HRG	CDK4	FABP2
HSR	TNF	FCER2
HTRA1	JUN	FGF1
IBD1	IL6	FGF2
IDD	CASP3	FGFR1
IDDM7	TP53	FKBP1A
IFNL2	NFKBIA	FLT1
IGAD1	MDM2	FOLR2
IGHD3	APP A4	FPGS
IGKC	MMP1	FPR2
IL12B	PCNA	G6PD
IL17B	ERBB2	GABBR1
IL17C	PPARG	GABBR2
IL1A	HMOX1	GRK2
IL4I1	CASP7	GRK6
IMD23	ICAM1	GSR
IMD36	MCL1	GSTM1
IMD53	BIRC5	GSTM2
IMD57	IL2	GSTP1
IMD67	IFNG	GUSB
IMD68	IL4	HAS2
IPEX	TOP2A	HDAC3
IRF1	GSTP1	HDAC9
IRF2	XIAP	HIF1A
IRF8	SLC2A4	HMGCR
IRGM	INSR	HMOX1
ITGA1	CD40LG	HRAS
ITGB2	PTGES	HRH1
JPHT	NUF2	HRH4
JRRP	ADCY2	HSD11B1
JUNB	HMGCR	HSD11B2
KDM5D	CYP51A1	HSD3B1
LACC1	NPC1L1	HSD3B2
LACH	NR1H3	HSP90AA1
LEP	RORC	HSPA5
LPFS3	CYP17A1	HTR2A
LST1	SREBF2	HTR3A
LTA	SHBG	ICAM1
LTB4R	RORA	IDO1
LTB4R2	CYP2C19	IFNG
LTBR	SLC6A2	IGF1R
MAHCC	PTPN1	IGF2
MAN2B2	SERPINA6	IGFBP3
MAPK9	SLC6A4	IKBKB
MATN3	BCHE	IL10
MCKD2	NR1I3	IL1A
MERTK	VDR	IL1B
MFS	CHRM2	IL2
MICA	CDC25A	IL4
MMDD	G6PD	IL6
MMP12	NR1H2	IL6ST
MMP2	CES2	IMPDH1
MMP9	GLRA1	IMPDH2
MOX2	PTGER1	IRAK4
MPLPF	PTGER2	IRF1
MTATP8	PPARA	ITGAL
MWS	PPARD	ITGB2
MYD88	DHCR7	JAK1
NCR3	SQLE	JAK2
NFKB1	HSD11B1	JAK3
NFKB2	PTPN6	JUN
NLRP1	FDFT1	KCNQ2
NLRP12	NOS2	KCNQ3
OS1	UGT2B7	KDR
OS2	POLB	KIT
PDB3	PREP	LBP
PFKM	PGR	LCK
PGF	MAPT	LGALS1
PHOAR1	MYLK	LGALS3
PHOAR2	APEX1	LGALS9
PLA2G2F	MPG	LRRK2
PLCG2	SLC22A12	LTA4H
PRAAS1	TOP2	LTB4R
PRAAS3	KCNH2	LYN
PRKCD	SCN5A	MAOA
PRKCQ	F10	MAP3K5
PRPS1	ADRB2	MAP3K7
PSHB	F7	MAP3K8
PSMA3	NOS3	MAPK1
PSMB4	RXRA	MAPK10
PSORS1	GABRA1	MAPK14
PSORS11	MAO	MAPK3
PSORS13	BCL2	MAPK8
PSORS3	FOS	MCL1
PSORS4	EIF6	MDM2
PSORS6	BAX	MIF
PSORS7	PLAU	MMP1
PSTPIP1	EGF	MMP12
PTGS2	CDKN2A	MMP13
PTPN12	AHSA1	MMP14
RARRES2	ELK1	MMP2
REL	POR	MMP3
RFH1	ODC1	MMP7
RLS1	CASP8	MMP8
RLSDF	RAF1	MMP9
S100A8	SOD	MPG
SAA1	PRKCA	MPO
SAVI	HIF1A	MTOR
SEDCJD	STAT1	MYC
SEDT	RUNX1T1	NAMPT
SELENOS	HSPA5	NCF1
SEMDX	ACACA	NFE2L2
SFSWAP	CYP3A4	NFKB1
SGMRT2	CYP1A2	NFKBIA
SIGLEC5	CAV1	NOS2
SLEB13	MYC	NOS3
SPDA2	F3	NR1I2
SPDA3	GJA1	NR3C1
STAT3	CYP1A1	OLR1
STAT5B	IL1B	OPRD1
STLS	CCL2	OPRK1
STSL1	SELE	OPRM1
SVD	VCAM1	P2RX7
TGFB1	PTGER3	PARP1
THPM1	CXCL8	PCNA
TLR7	PRKCB	PDE2A
TLR9	DUOX2	PDE3A
TNC	HSPB1	PDE4A
TNFRSF11B	TGFB1	PDE4B
TNFSF11	SULT1E1	PDE4D
TNNI2	MGAM	PDE5A
TNXB	NR1I2	PDGFRB
TPMT	PLAT	PDPK1
TRAF3IP2	THBD	PER2
TRAPPC2	SERPINE1	PFKFB3
TRAT1	COL1A1	PGF
TRNT1	ALOX5	PGR
TSPAN8	PTEN	PIK3CA
TTR	IL1A	PIK3CB
TWIST1	NCF1	PIK3CD
TYRO3	ABCG2	PIK3CG
UAQTL1	HAS2	PIK3R1
UOX	NFE2L2	PLA2G10
VAIHS	NQO1	PLA2G1B
VEGFB	PSMD3	PLA2G2A
WAS	COL3A1	PLAT
WIF1	gyrB	PLAU
XBP1	CXCL11	PLB1
YAOS	CXCL2	PLG
5-LOX	DCAF5	PON1
ABCA5	CHEK2	PPARD
ABCB1	CLDN4	PPARG
ABCB11	HSF1	PPIA
ABCC1	CRP	PPP1CA
ABCC11	CXCL10	PREP
ABCC2	CHUK	PRF1
ABCC3	SPP1	PRKCA
ABCC4	RUNX2	PRKCB
ABCC5	RASSF1	PRKCD
ABCC6	E2F1	PRKCH
ABCC8	E2F2	PRKCQ
ABCF1	ACP3	PRKDC
ABCG2	CTSD	PTEN
ABCG2	IGFBP3	PTGDR2
ACACA	IGF2	PTGER4
ACAD8	IRF1	PTGES
ACAN	ERBB3	PTGS1
ACAT1	PON1	PTGS2
ACE	DIO1	PTK2
ACE2	PCOLCE	PTPN11
ACHE	NPEPPS	PTPN2
ACKR3	HK2	PTPRC
ACOT7	NKX3-1	RARA
ACOXL	RASA1	RARB
ACP1	PRXC1A	RBP4
ACP5	GSTM1	RELA
ACR	GSTM2	ROCK2
ACSBG1	MAOB	RORC
ACTA2	SOD1	RUNX2
ACTB	SAE1	S1PR1
ACTBL2	UBA2	SCN10A
ACTG1	NR1H4	SELP
ACTG2	PTPN2	SERPINA6
ACTR2	CDC25C	SERPINE1
ACVRL1	GPBAR1	SHBG
ADA	PTPRF	SIRT1
ADAM10	ACP1	SLC22A6
ADAM15	CDC25B	SLC28A3
ADAM17	PDE4D	SLC2A1
ADAMTS12	FABP1	SLC46A1
ADAMTS13	SCD	SLC6A3
ADAMTS4	ALOX5AP	SLC6A4
ADAMTS5	HSD17B3	SLPI
ADAR	GABBR1	SOAT1
ADGRE5	PRKCH	SOD1
ADI1	HSD11B2	SRC
ADIPOQ	PTPN11	SRD5A2
ADM	SIGMAR1	ST6GAL1
ADORA2A	GABRB2	STAT1
ADORA2ASPECC1L	GABRG2	STAT3
ADORA3	GABRA2	STS
ADRB2	TLR9	SYK
ADRM1	FABP2	TACR1
AFF3	CD81	TACR3
AGBL2	ADORA3	TBXAS1
AGBL3	OPRD1	THBD
AGER	OPRM1	TOP1
AGP	KIT	TP53
AGPAT1	TAS2R31	TPMT
AGRN	NAE1	TRPV1
AGTR1	CHEK1	TSPO
AHR	CALM	TTR
AHSA1	LTB4R	TXK
AHSG	FNTA	TYK2
AICDA	FNTB	TYMP
AIF1	NR3C2	TYMS
AIFM2	FAAH	TYR
AIMP2	FFAR1	UGT1A1
AIRE	FABP4	UGT2B7
AKR1B1	FABP3	VCAM1
AKR1B10	FABP5	VDR
AKR1C1	NR3C1	VEGFA
AKR1C2	SLC6A3	XDH
AKR1C4	SRD5A2	XIAP
AKR1D1	PTGDR2
AKT1	PTGER4
AKT2	AMPD2
ALB	GRIK1
ALB	GRIK2
ALOX15	AGTR1
ALOX5	GLUL
ALOX5	CHRM3
ALPK1	CHRM1
ALPL	GABRA3
ALPP	ADRA1B
AMACR	GRIA2
AMBP	GABRA6
AMH	GABRA5
AMPD1	ADH1B
AMPK	ADH1C
ANGPT1	LYZ
ANGPT2	cobT
ANGPTL4	PDE3A
ANKH	camC
ANKRD55	MAPK14
ANO8	CCNA2
ANP32B	PYGM
ANPEP	NCOA1
ANXA1	OLR1
ANXA3	DRD1
ANXA5	CHRM4
AOC1	HTR2A
AP4B1-AS1	ADRA1A
APC	CHRNA2
APLN	CHRNA7
APOA1	MAP2
APOB	PDE5A
APOE	PDE2A
APOH	PDE3B
APOM	PDE10A
APP	PDGFRB
APRT	PDGFRA
AQP1	PDE4C
AQP5	PRKCE
AR	RPS6KA2
ARAP2	MAPK8
ARHGEF2	MAPK10
ARHGEF5	MAPK9
ARID5B	FGFR1
ARL15	LRRK2
ARMH1	NPBWR1
ARNTL	CNR1
ASB15	CNR2
ASB15-AS1	RET
ASF1A	NTRK1
ASIC1	TUBB1
ASIC3	CYP11B1
ASPN	CYP11B2
ATAT1	SIRT1
ATF6B	P2RX7
ATG5	ADORA2B
ATIC	SCN10A
ATK	TGFBR1
ATM	JAK3
ATN1	PPP1CA
ATOD1	JAK1
ATOD3	JAK2
ATOD5	TYK2
ATOD6	PIK3CA
ATOD7	CMA1
ATOD8	CCND2
ATOD9	CCND3
ATP2A	PRKCQ
ATP5F1E	LIPG
ATP6AP1	NAMPT
ATP6V0A2	FPR1
ATP6V0D1	FPR2
ATP6V0E2	PGGT1B
ATP6V1B1	EPHX2
ATP6V1F	PDE7A
ATP6V1G2	PIK3CD
ATP6V1G2-DDX39B	PIK3CB
ATXN2	CLK1
B2M	CCNT1
B3GAT1	CDK9
B3GNT2	PPIA
B3GNT9	AURKA
BACE	PIK3C2A
BACH2	PRKDC
BAG6	BDKRB2
BAIAP2L1	TTK
BANK1	PIK3C2B
BAX	BCL2A1
BBC3	MAP2K1
BCHE	BAZ2B
BCL2	CRHR1
BCL2A1	CSF1R
BCL2L1	LCK
BCL2L11	CDK7
BCL2L15	BAZ2A
BCL6	UTS2R
BCR	ADRB1
BDKRB1	HTR3A
BDKRB2	ADRA2C
BDNF	ADRA1D
BECN1	CHRM5
BEST1	RXRB
BGLAP	KCNMA1
BGN	ALOX15B
BIRC5	ABL1
BLK	ADAMTS5
BMP2	PLA2G7
BMP4	ADAM17
BMP6	WEE1
BMP7	HSP90AA1
BMPR2	TYMS
BMS1	NEK1
BPI	MMP7
BRAF	FLT4
BRD2	PIM2
BSG	EGLN1
BST1	NDUFA4
BTF3P11	GUSB
BTG3	ANPEP
BTK	MMP16
BTLA	MMP8
BTNL2	QPCT
C18orf56TYMS	DRD2
C1QA	MKNK1
C1R	TAAR1
C2	GCGR
C2-AS1	CLK4
C3	CLK2
C3orf67	CLK3
C3orf67-AS1	DYRK1B
C4A	LDHB
C4B	ALPL
C4B_2	IMPDH2
C5	ATP4B
C5AR1	ATP4A
C6orf47	FASN
C9orf72	RPS6KB1
CA2	FYN
CA3	EPHA2
CADM	YES1
CALCA	BLK
CALCR	CSK
CALD1	EPHB2
CALR	BMX
CAMK2	LYN
CAMP	EPHA5
CAPZB	EPHA4
CARD14	TXK
CARD8	FGR
CARD9	EPHA6
CASP1	PTK6
CASP10	PDF
CASP3	EPHB3
CASP8	EPHA3
CAST	BTK
CASTOR1	TYRO3
CAT	COQ8B
CAV1	EPHA1
CAV2	PLAA
CB2	FKBP1A
CBL	QPCTL
CBLL2	ALDH2
CCHCR1	TBXAS1
CCK	HTR2C
CCL1	ESRRB
CCL11	CBR1
CCL13	MIF
CCL17	CA5B
CCL18	DHODH
CCL19	STS
CCL2	ERCC5
CCL20	FEN1
CCL21	PKIA
CCL22	DPEP1
CCL24	SIRT1
CCL26	ATP5F1B
CCL27	MT-ND6
CCL3	HSD3B2
CCL3L1	HSD3B1
CCL4	EIF4A1
CCL5	SLC29A1
CCL7	SLC5A2
CCL8	GBA
CCN1	SLC28A2
CCN2	SLC2A1
CCN6	MGMT
CCNA	ADK
CCND1	LGALS3
CCNG2	LGALS1
CCR1	LGALS7
CCR2	LGALS9
CCR3	COMT
CCR4	HTT
CCR5	VCP
CCR6	MTOR
CCR7	EZR
CCR8	MAPKAPK2
CCRL2	ERN1
CD14	BMP1
CD160	MMP25
CD163	ADAM10
CD19	LNPEP
CD1A	CTSS
CD1C	NR4A1
CD1E	CDC7
CD2	DBF4
CD20	ALPG
CD226	DNM1
CD24	HDAC3
CD244	HDAC2
CD247	NCOR2
CD27	HDAC5
CD274	HDAC7
CD276	NCOR1
CD28	HDAC11
CD34	HDAC4
CD36	HDAC9
CD38	MBD2
CD3E	DYRK2
CD4	TUBB3
CD40	GRM4
CD40LG	DUSP3
CD44	HSP90AB1
CD46	IKBKB
CD5	PPP3CA
CD55	SLPI
CD58	DHFR
CD59	SLC19A1
CD6	SLC46A1
CD63	FOLR1
CD68	HDAC8
CD69	FPGS
CD70	FOLR2
CD79A	HDAC6
CD80	HDAC1
CD81	GART
CD83	ATIC
CD84	SLC5A1
CD86	DAO
CD8A	FLT1
CD93	HDAC10
CDAN1	PIM3
CDC42	CSNK1G1
CDC42EP1	RPS6KA1
CDC42EP3	ROCK1
CDH11	BAD
CDK4	CCNE1
CDK5RAP2	CCNE2
CDK6	PDK1
CDKN1A	PRF1
CDKN2A	IMPDH1
CDKN2D	SGK1
CDKN3	EP300
CDR3	FCER2
CDSN	SLC5A4
CELA1	HRAS
CELF2	CHIA
CENPA	ADRA2A
CENPB	LTA4H
CEP89	CTRB1
CERS6	CAT
CFB	PDPK1
CFH	KCNA3
CFHR2	MDM4
CFI	TRPM8
CFLAR	ROCK2
CFP	THRA
CFTR	THRB
CGAS	HPGDS
CHD7	ITGB2
CHI3L1	ITGAL
CHRM3	CAPN1
CHST11	BRAF
CHUK	GNRHR
CIITA	ITK
CILP	CHRNA4
CISH	CHRNB2
CLEC12A	PSENEN
CLEC16A	NCSTN
CLEC4A	APH1A
CLIC1	PSEN1
CLOCK	APH1B
CLSTN2	PSEN2
CLU	PLA2G2A
CLYBL	NAAA
CMA1	HCRTR2
CNR1	TACR3
CNR2	NPY5R
CNTFR	PDE4B
CNTNAP2	HTR1A
CNTRL	P2RX3
CO5	S1PR3
COG6	S1PR1
COL11A1	STAT3
COL11A2	FOSL2
COL11A2P1	FUT7
COL1A1	LDHA
COL1A2	TPMT
COL2A1	KCNJ1
COL4A1	BACE2
COL5A1	ADCY1
COL9A1	DDOST
COL9A2	BIRC2
COMP	C5AR1
COMT	F2R
COPD	LIMK2
COX	HRH4
COX-1	GABRB3
COX2	ACACB
COX-2	HRH3
COX5A	RARG
CP	RARB
CPA4	RARA
CPT2	RXRG
CR1	PRKCD
CR2	PDE6D
CRABP2	NPY2R
CREB1	GRIN2B
CREM	MGAT2
CRF	CTSK
CRH	SLC6A9
CRISP2	GCK
CRK	ASAH1
CRLF1	TACR1
CRP	PTGIR
CRYGD	MTNR1A
CSF1	MTNR1B
CSF1R	KCNK3
CSF-1R	MAP3K5
CSF2	KCNQ3
CSF2RA	KCNQ2
CSF3	RBP4
CSK	TBXA2R
CSMD3	PTAFR
CSN1S1	CETP
CSNK2B	LIPE
CSRP3	PARP2
CST3	SOAT1
CST5	AOC3
CSTA	SOAT2
CSTF3	KIF11
CTHRC1	CASR
CTIF	GRM5
CTLA4	MAP3K8
CTLA-4	SRD5A1
CTNNB1	MAPK3
CTSB	CCR5
CTSD	TRPA1
CTSG	TRPV1
CTSK	CES1
CTSL	IDO1
CTSS	PLA2G5
CUL5	PLA2G10
CX3CL1	KLK1
CX3CR1	KLK2
CXCL1	EDNRA
CXCL10	HSD17B14
CXCL11	DYRK1A
CXCL12	YWHAG
CXCL13	RPS6KA5
CXCL16	NQO2
CXCL2	GRM2
CXCL3	CYP2C9
CXCL5	HNF4A
CXCL6	PGF
CXCL8	CDK3
CXCL9	CALM1
CXCR1	SSTR2
CXCR2	SSTR4
CXCR2P1	SSTR1
CXCR3	SSTR3
CXCR4	FGF1
CXCR5	FGF2
CXCR6	EIF4H
CYBB	PABPC1
CYCS	HK1
CYP11B1	SSTR5
CYP11B2	FUCA1
CYP17A1	SLC28A3
CYP19A1	GAPDH
CYP1A1	MAP3K9
CYP1A2	METAP2
CYP1B1	HPSE
CYP21A2	ADA
CYP24A1	MME
CYP27B1	CYP2D6
CYP2A6	GPER1
CYP2B6	ADCY10
CYP2C18	ST6GAL1
CYP2C19	HAO1
CYP2C8	CD14
CYP2C9	LBP
CYP2D6	SELP
CYP2E1	PPM1A
CYP3A	HSPA8
CYP3A4	PRKCG
CYP3A43	OGA
CYP3A5	MAP3K7
CYP3A7	CASP6
CYP4A11	CASP1
CYP4F22	KDM2A
CYP4F23P	PHF8
CYRIB	KDM5C
DAXX	SLC22A6
DBP	PER2
DCDC2C	CDC45
DCLRE1C	PTPRC
DCN	TTL
DCT	GABBR2
DCTN4	SLC10A2
DDA1	CCR1
DDC	IL6ST
DDIT4	AVPR1A
DDR1	OXTR
DDR1-DT	OPRL1
DDR2	ABHD6
DDX39A	SCN9A
DDX39B	BRD4
DDX41	HRH1
DDX43	AGTR2
DDX6	UGCG
DECR1	GBA2
DEFB4A	AMD1
DEK	CCR4
DENND1A	HSP90B1
DGKQ	GPR84
DHFR	PGK1
DHODH	MGLL
DHX16	SLC5A7
DHX40	GRM1
DICER1	HTR7
DKK1	PDE4A
DKK3	HCRTR1
DLG2	CYP27A1
DMD	SIRT3
DNASE1	SIRT2
DNASE1L3	CXCR2
DNASE2	KDM1A
DNMT1	CACNA2D1
DNMT3B	TGM2
DNTT	PDE1B
DPEP1	KCNA5
DPP4	ABAT
DRAIC	ADCY5
DRD2	CTSL
DSG1	LDLR
DSG3	MTTP
E2F2	APOB
EBI3	PLB1
EBNA1BP2	UGT1A1
EBP	SREBF1
EDN1	GSR
EDNRA	ADIPOQ
EEF1A1	GOT1
EGF	MAC1
EGFL8	DGAT2
EGFR	CCKBR
EGR1	S1PR2
EHMT1	NR1D1
EHMT2	MELK
EHMT2-AS1	MMP14
ELANE	GRIA1
ELAVL2	PNMT
ELMO1	CDK8
ELMO2	CCNC
ELMOD2	SLC1A3
ELN	SNCA
EMCN	CCNA1
ENG	GSK3A
ENO1	ADAM9
ENO2	CXCR4
ENOSF1TYMS	MPEG1
ENOX1	GLI2
ENPP1	GLI1
ENPP2	GRK2
ENSG00000240350	SLC9A1
ENTPD1	MAP4K4
EPHB1	CNOT7
EPHB2	OPRK1
EPO	FBP1
ERAP1	CALCA
ERAP2	KISS1R
ERBB2	IDH1
ERG	MARK1
ERICH1	HCK
ESR1	PI4KB
ESR2	EPHB4
ESRRA	FGFR2
ETFA	SPHK2
ETS1	SPHK1
ETV7-AS1	ADAMTS4
EVPL	HPGD
EXOSC10	RASGRP3
EZH2	HTR6
F13A1	DUT
F2	EDNRB
F2RL1	FOLH1
F3	ME1
F5	CPT1A
F9	NFKB1
FABP2	MERTK
FADD	PAK4
FADS1	RPS6KA3
FADS2	BMP4
FAM107A	ACVR1
FAM167A	NOX1
FAS	AKT2
FASLG	STK17B
FBL	IRAK4
FBN1	ST3GAL3
FBXL19	FUT4
FBXL19-AS1	CTSB
FBXW8	TYMP
FCAR	NTRK2
FCER2	ELANE
FCGR1A	PANK3
FCGR1B	TSPO
FCGR2A	PTGFR
FCGR2B	PDE11A
FCGR2C	PDE1A
FCGR3A	PDE1C
FCGR3B	KCNK2
FCGRT	SLC2A3
FCN1	SLC2A2
FCN2	CPB1
FCRL3	APLNR
FCRLA	SMO
FGF1	P2RY12
FGF2	GPR18
FGFR1
FHL1
FHL5
FKBP1A
FKBP5
FLACC1
FLG
FLNB
FLT1
FLT3LG
FMR1
FN1
FOLR2
FOS
FOSB
FOXC1
FOXO3
FOXO4
FOXP3
FPGS
FPR2
FRG2C
FRZB
FSCN1
FST
FSTL1
FTO
FUN1
G6PD
GABBR1
GABBR2
GABPA
GADD45A
GADD45B
GALNT18
GART
GAS6
GAST
GATA3
GATA3-AS1
GBP6
GC
GCG
GCH1
GCR
GDAP1
GDE1
GDF15
GDF5
GDNF
GEM
GFRA1
GGH
GGT1
GHR
GHRL
GHSR
GIN1
GLB1
GLP1R
GLS
GMPS
GNAQ
GNAS
GNL1
GNRH1
GOLGB1
GORASP1
GP1BA
GP6
GPANK1
GPC5
GPI
GPRC5A
GPSM3
GPT
GRAP2
GRB2
GRK2
GRK6
GRN
GSDMB
GSDME
GSN
GSR
GST
GSTA1
GSTA2
GSTK1
GSTM1
GSTM2
GSTP1
GSTT1
GTF2H1
GTF2I
GUCY1B2
GUSB
GZMA
GZMB
H19
H2AC18
H2BC21
H3P13
H3P28
H3P44
H4-16
H4C1
H4C11
H4C12
H4C13
H4C14
H4C15
H4C2
H4C3
H4C4
H4C5
H4C6
H4C8
H4C9
H4R
HAMP
HAPLN1
HAS1
HAS2
HAVCR1
HAVCR2
HBEGF
HCG17
HCG18
HCG22
HCG27
HCG9
HCLS1
HCP5
HDAC
HDAC3
HDAC9
HECTD4
HFE
HGD
HGF
HIF1A
HIV tat
HJV
HLA-A
HLA-B
HLA-C
HLA-DMA
HLA-DMB
HLA-DOA
HLA-DOB
HLA-DPA1
HLA-DPA2
HLA-DPB1
HLA-DPB2
HLA-DQA1
HLA-DQA2
HLA-DQB1
HLA-DQB2
HLA-DQB3
HLA-DRA
HLA-DRB1
HLA-DRB3
HLA-DRB4
HLA-DRB5
HLA-DRB9
HLA-E
HLA-G
HLA-S
HMGB1
HMGB2
HMGCR
HMOX1
HNRNPA1P2
HNRNPA2B1
HNRNPC
HNRNPDL
HOTAIR
HOXC6
HOXD10
HOXD11
HOXD13
HOXD9
HP
HPGDS
HPRT1
HPSE
HRAS
HRH1
HRH2
HRH4
HSD11
HSD11B1
HSD11B2
HSD17B8
HSD3B1
HSD3B2
HSP90AA1
HSPA14
HSPA1L
HSPA4
HSPA5
HSPD1
HSPG2
HT
HTD2
HTR2A
HTR3A
HTRA1
IAPP
IBSP
ICAM1
ICAM2
ICAM3
ICOS
ICOSLG
IDDM8
IDO1
IFI16
IFIH1
IFNA1
IFNA13
IFNA2
IFNB1
IFNG
IFNG-AS1
IFNGR1
IFNGR2
IFNL1
IGES
IGF1
IGF1R
IGF2
IGFBP1
IGFBP2
IGFBP3
IGFBP5
IGHE
IGHG3
IGHM
IGHV3-52
IGHV3-69-1
IGHV3OR16-7
IGKC
IKBKB
IKBKE
IKBKG
IKZF3
IL1
IL10
IL10RA
IL11
IL12A
IL12B
IL12RB1
IL12RB2
IL13
IL15
IL15RA
IL16
IL17
IL17A
IL17B
IL17D
IL17F
IL17R
IL17RA
IL18
IL18BP
IL18R1
IL19
IL1A
IL1B
IL1F10
IL1R1
IL1R2
IL1RAP
IL1RAPL2
IL1RL1
IL1RN
IL2
IL20
IL21
IL21R
IL22
IL22RA1
IL23
IL23A
IL23R
IL24
IL26
IL27
IL2RA
IL2RB
IL3
IL31
IL32
IL33
IL34
IL36A
IL36RN
IL37
IL4
IL4R
IL5
IL6
IL6R
IL6ST
IL7
IL7R
IL9
ILF3
IMPDH1
IMPDH2
INPP5E
INS
IP6K3
IRAK1
IRAK4
IREB2
IRF1
IRF3
IRF4
IRF5
IRF8
IRS1
IRX1
ISG20
ITGA1
ITGA2
ITGA4
ITGA4/B7
ITGA6
ITGAE
ITGAL
ITGAM
ITGAV
ITGAV/B3
ITGAX
ITGB1
ITGB2
ITPA
ITPR3
IVL
JAK1
JAK-1
JAK2
JAK-2
JAK3
JAK-3
JAM3
JAZF1
JUN
JUNB
JUND
KCNQ2
KCNQ3
KDR
KHDRBS1
KIAA1109
KIF26B
KIF5A
KIR2DL1
KIR2DL2
KIR2DL3
KIR2DS1
KIR2DS2
KIR3DL1
KIR3DL2
KIT
KITLG
KL
KLF2
KLK7
KLRB1
KLRC1
KLRC2
KLRC4-KLRK1
KLRD1
KLRK1
KNG1
KRAS
KRT14
KRT18
KRT20
KRT5
LACC1
LAIR1
LALBA
LANCL1
LBH
LBP
LBR
LCAT
LCE3B
LCE3C
LCK
LCN2
LECT2
LEP
LEPQTL1
LEPR
LGALS1
LGALS3
LGALS3BP
LGALS8
LGALS9
LHX2
LIF
LILRA3
LILRB1
LIN54
LINC00243
LINC00294
LINC00426
LINC00452
LINC00824
LINC01104
LINC01185
LINC01193
LINC01748
LINC01934
LINC02196
LINC02356
LINC02357
LINC02384
LINC02571
LINC02605
LINC02649
LINC02656
LMNA
LNCPRESS1
LOC102723407
LOC102724971
LOC105379528
LOC390714
LORICRIN
LOX
LPA
LPAR1
LPAR2
LRBA
LRG1
LRP5
LRPPRC
LRRC18
LRRK2
LSM2
LST1
LTA
LTA4H
LTB
LTB4R
LTBR
LTF
LY6G5B
LY6G5C
LY6G6C
LY6G6D
LY6G6F
LY96
LYN
MAB21L2
MACIR
MAFB
MAGI3
Malaria DHOdehase
MALAT1
MALT1
MAOA
MAP2K4
MAP2K6
MAP2K7
MAP3K14
MAP3K4
MAP3K5
MAP3K7
MAP3K8
MAP4K3
MAPK
MAPK1
MAPK10
MAPK12
MAPK13
MAPK14
MAPK3
MAPK8
MAPKAPK5
MARCKS
MATN1
MATN3
MBL2
MBL3P
MBP
MC1R
MC2R
MC3R
MCCD1
MCHR1
MCL1
MDC1
MDC1-AS1
MDGA2
MDK
MDM2
MECP2
MEFV
MEG3
MFGE8
MGARP
MICA
MICB
MIF
MIP
MIR10A
MIR125A
MIR126
MIR132
MIR140
MIR142
MIR143
MIR145
MIR146A
MIR150
MIR155
MIR16-1
MIR17
MIR17HG
MIR19B1
MIR20A
MIR21
MIR22
MIR221
MIR223
MIR23B
MIR27A
MIR30A
MIR323A
MIR338
MIR34A
MIR451A
MIR499A
MIRLET7D
MITF
MLANA
MLN
MMEL1
MMP
MMP1
MMP-1
MMP10
MMP12
MMP13
MMP-13
MMP14
MMP15
MMP17
MMP19
MMP2
MMP3
MMP-3
MMP7
MMP8
MMP-8
MMP9
MMP-9
MMRN1
MOB3B
MOCOS
MPG
MPIG6B
MPO
MPP1
MPZ
MRAP
MS4A1
MSC
MSH5
MSH5-SAPCD1
MSI1
MSN
MSRA
MSTN
MTCO2P12
MTCO3P1
MT-CYB
MTF1
MTHFD1
MTHFR
MTOR
MTR
MTRR
MTX1
MUC1
MUC22
MUC5B
MUCL3
MUL1
MVK
MYC
MYD88
MYDGF
MYL8P
MYO18B
MYOM2
N4BP1
NAGLU
NAMPT
NAT2
NAV2
NCAM1
NCF1
NCF2
NCKIPSD
NCOA5
NDUFA4L2
NE
NEBL
NECAB2
NELFCD
NELFE
NFAT5
NFATC1
NFE2L2
NFKB
NFKB1
NFKB2
NFKBIA
NFKBIE
NFKBIL1
NFKB-p38
NGF
NGFR
NIE
NKAPL
NKG2A
NKX2-1
NLRP1
NLRP12
NLRP3
NM
NOD1
NOD2
NONOP2
NOS1
NOS2
NOS3
NOTCH1
NOTCH4
NPPB
NPSR1
NPY
NR0B1
NR1I2
NR3C1
NR4A2
NR4A3
NRM
NTF3
NTF4
NTN1
NUDT10
NUDT15
NUP62
NUP88
NXF1
ODF
OGG1
OLAH
OLIG3
OLR1
OPRD1
OPRK1
OPRM1
OR12D3
OR2H2
OR5V1
ORAI1
ORM1
OS9
OSCAR
OSM
P2RX7
p38
p38 alpha
p38 beta
p38α
P4HB
PADI2
PADI3
PADI4
PAEP
PAH
PAK3
PAPOLA
PARP1
PAX5
PBX2
PCBD1
PCDH15
PCNA
PCSK6
PDCD1
PDCD1LG2
PDE2A
PDE3A
PDE4A
PDE4B
PDE4D
PDE5A
PDGFB
PDGFRB
PDPK1
PDPN
PDS5A
PECAM1
PER2
PF4
PFKFB3
PFKM
PGBD1
PGD
PGF
PGR
PGY1
PHACTR3
PHF19
PHRF1
PHTF1
PIK3CA
PIK3CB
PIK3CD
PIK3CG
PIK3R1
PIK3R2
PIK3R3
PIP4K2C
PIWIL2
PLA2G10
PLA2G1B
PLA2G2A
PLA2G4A
PLAT
PLAU
PLAUR
PLB1
PLCL1
PLCL2
PLD4
PLEK
PLG
PLOD2
PMEL
PML
PMP22
PNOC
PNP
POLDIP2
POLG2
POMC
PON1
POTEKP
POTEM
POU2AF1
POU3F1
POU5F1
PPARA
PPARD
PPARG
PPBP
PPIA
PPIAP9
PPIL4
PPL
PPP1CA
PPP1CB
PPP1CC
PPP1R10
PPT2
PPT2-EGFL8
PRAM1
PRDM1
PRDM10
PRDM16
PRDX5
PREP
PRF1
PRG2
PRG4
PRKCA
PRKCB
PRKCD
PRKCH
PRKCQ
PRKDC
PRKN
PRL
PRO
PROC
PRORP
PRR12
PRRC2A
PRRT1
PRRT2
PRSS2
PRSS55
PRTN3
PSG5
PSMA4
PSMB8
PSMB8-AS1
PSMB9
PSMD12
PSMD7
PSMD9
PSORS1C1
PSTPIP1
PTCH1
PTEN
PTGDR2
PTGER1
PTGER4
PTGES
PTGS1
PTGS2
PTH
PTHLH
PTK
PTK2
PTK2B
PTPN11
PTPN13
PTPN2
PTPN22
PTPN3
PTPRC
PTPRM
PTX3
PVT1
PXK
PYCARD
RAB14
RAB8A
RABEP1
RABEPK
RAC1
RAC2
RAD51B
RAG1
RAG2
RAP2A
RAPH1
RARA
RARB
RARRES2
RASGRP1
RAVER1
RBFOX1
RBM45
RBP4
RBPJ
RCAN1
RCHY1
REG1A
REL
RELA
RELB
RELN
REN
RETN
RFC1
RGMB
RHO
RHOA
RHOD
RIPK1
RIPK2
RIPK3
RIPOR2
RIT2
RMC1
RNASE2
RNASE3
RNASEH2A
RNASEH2B
RNASEH2C
RNF19A
RNF5
RNPC3
RO60
ROCK2
RORC
ROS1
RPL37A
RPL3P2
RPP14
RPP21
RPS18
RPS19
RPS6KA3
RPSA
RSBN1
RTKN2
RUNX1
RUNX2
RXRA
S100A1
S100A12
S100A4
S100A7
S100A8
S100A9
S100B
S1PR
S1PR1
SAA1
SAA2
SAA4
SAMHD1
SCD5
SCGB1A1
SCN10A
SCN4A
SCO2
SDC1
SDF2L1
SEC14L2
SEC14L3
SELE
SELL
SELP
SEMA3A
SEMA6A
SERPINA1
SERPINA3
SERPINA6
SERPINA7
SERPINC1
SERPINE1
SERPINF1
SERPINH1
SFRP1
SFTA2
SFTPB
SFTPC
SFTPD
SGCZ
SGPL1
SGSM3
SH2B3
SH2D1A
SH3BP4
SH3PXD2A
SH3TC2
SHBG
SHMT1
SIAE
SIGIRR
SIGLEC1
SIGLEC5
SIK1
SIK1B
SIL1
SIRT1
SIRT6
SKIV2L
SLC11A1
SLC17A
SLC17A5
SLC19A1
SLC22A1
SLC22A11
SLC22A2
SLC22A4
SLC22A5
SLC22A6
SLC22A7
SLC22A8
SLC25A12
SLC28A3
SLC29A2
SLC2A1
SLC36A2
SLC43A3
SLC44A4
SLC46A1
SLC52A1
SLC6A11
SLC6A14
SLC6A3
SLC6A4
SLC7A11
SLC7A5
SLC7A9
SLCO1A2
SLCO1B1
SLCO1B3
SLCO1C1
SLCO2B1
SLCO6A1
SLPI
SMAD3
SMG7
SMIM40
SMS
SMTNL2
SMUG1
SNHG28
SNHG29
SNHG32
SNORA38
SNRNP70
SNRPA
SNRPD3
SNRPN
SNX9
SOAT1
SOCS1
SOCS3
SOD1
SOD2
SOST
SOX5
SP1
SPARC
SPINK5
sPLA2
SPN
SPP1
SPPL2C
SPRED2
SPRY2
SPSB1
SPTAN1
SPZ1
SQSTM1
SRC
SRD5A2
SRF
SSB
SST
ST6GAL1
ST6GALNAC5
STAG1
STAT1
STAT3
STAT4
STAT5B
STAT6
STEAP4
STING1
STK19
STS
SULT1A3
SULT2A1
SUMO1
SUMO4
SUOX
SUPT20H
SYK
SYNGAP1
SYNGR1
SYT1
SYVN1
TAC1
TAC3
TACR1
TACR3
TAGAP
TAP1
TAP2
TAPBP
TBC1D9
TBX21
TBX5
TBXAS1
TCF19
TCIRG1
TCN1
TCP11L1
TDO2
TDRKH
TEC
TEK
TERT
TF
TFF3
TFPI2
TFR2
TFRC
TG
TGFA
TGFB1
TGFB2
TGFB3
TGFBR1
TGFBR2
TGIF1
TH
THBD
THBS1
THPO
TIE1
TIMD4
TIMELESS
TIMP1
TIMP2
TIMP3
TLE3
TLR
TLR1
TLR10
TLR2
TLR3
TLR4
TLR5
TLR6
TLR7
TLR8
TLR9
TM7SF2
TMEM179
TMEM187
TMEM235
TMPO
TMPOP1
TNC
TNF
TNFAIP2
[truncated: 156 more rows]
